# Supplementary material
Source: PubMed Central journal article supplement (PMC2569195)
Supplement: NIHMS62050-supplement-File003.pdf [file NIHMS62050-supplement-File003.pdf]

## SUPPORTING INFORMATION

**Supplemental Table 1:** Primers used in PurE Mutagenesis

| Primer ID | Primer Name | Sequence (5'→3') <sup>a</sup>             |
|-----------|-------------|-------------------------------------------|
| 1         | H45N.KUNK   | CGGGGGTGC <b>GGTT</b> AGCAGAAACCAC        |
| 2         | H45Q.KUNK   | TATCGGGGGTGC <b>TTG</b> AGCAGAAACC        |
| 3         | H45W.DN     | GGGGGTGC <b>CCA</b> AGCAGAAACCACTTCAACGTG |

<sup>a</sup>Mutagenic sites are in bold.

**Supplemental Table 2:**  $\Delta\epsilon_{250}$  and Rates of CAIR  
Decarboxylation at Various pH Values

| pH  | $\Delta\epsilon_{250}$ ( $M^{-1} \text{ cm}^{-1}$ ) | Non-enzymatic CAIR<br>Decomposition<br>( $\Delta A_{250}/\text{min}$ ) |
|-----|-----------------------------------------------------|------------------------------------------------------------------------|
| 5.1 | 2129                                                | -0.02                                                                  |
| 5.6 | 3650                                                | -0.01                                                                  |
| 6.1 | 4646                                                | -0.01                                                                  |
| 6.6 | 5331                                                | -0.01                                                                  |
| 7.0 | 5513                                                | 0.00                                                                   |
| 7.3 | 5955                                                | 0.00                                                                   |
| 7.6 | 6083                                                | 0.00                                                                   |
| 7.9 | 6230                                                | 0.00                                                                   |
| 8.2 | 6091                                                | 0.00                                                                   |
| 8.5 | 5970                                                | 0.00                                                                   |
| 8.8 | 5764                                                | 0.00                                                                   |
| 9.2 | 5361                                                | 0.00                                                                   |
| 9.5 | 4960                                                | 0.00                                                                   |

---

**Supplemental Table 3: ESI MS Results for PurE Mutants**

---

|           | Observed Mass | Expected Mass |
|-----------|---------------|---------------|
| WT Enzyme | 17,650.4      | 17,650.1      |
| H45N      | 17,626.0      | 17,626.0      |
| H45Q      | 17,640.0      | 17640.1       |
| H45W      | 17,698.0      | 17,698.2      |

---

| <b>Supplemental Table 4. SV-AUC Results for WT and Mutant PurE Proteins</b> |                   |                  |                            |
|-----------------------------------------------------------------------------|-------------------|------------------|----------------------------|
| Protein                                                                     | Predicted MW (Da) | Observed MW (Da) | RMSD of Fit of SV-AUC Data |
| WT                                                                          | 141,200           | 140,740          | 0.0046                     |
| H45N                                                                        | 141,010           | 146,430          | 0.0044                     |
| H45Q                                                                        | 141,120           | 149,940          | 0.0043                     |
| H45W                                                                        | 141,590           | 139,500          | 0.0045                     |

**Supplemental Table 5.** Summary of the available PurE structures

| PDB ID | organism            | mutation | pH  | monomers per asu | ligand *            |
|--------|---------------------|----------|-----|------------------|---------------------|
| 1QCZ   | <i>E. coli</i>      | wt       | 8.0 | 1                | none                |
| 1XMP   | <i>B. anthracis</i> | wt       | 7.5 | 8                | none                |
| 2FWA   | <i>A. aceti</i>     | H89N     | 7.0 | 2                | none                |
| 2FWB   | <i>A. aceti</i>     | H89F     | 8.0 | 2                | none                |
| 2FW7   | <i>A. aceti</i>     | H59N     | 8.0 | 2                | none                |
| 2FW8   | <i>A. aceti</i>     | H89G     | 8.0 | 2                | none                |
| 1Q4V   | <i>T. maritima</i>  | wt       | 5.6 | 1                | sulfate             |
| 2FW9   | <i>A. aceti</i>     | H59F     | 8.0 | 2                | sulfate/none        |
| 2FW1   | <i>A. aceti</i>     | wt       | 8.5 | 2                | acetate A/acetate B |
| 1U11   | <i>A. aceti</i>     | wt       | 5.4 | 2                | citrate A/citrate B |
| 2FW6   | <i>A. aceti</i>     | H59N     | 5.4 | 2                | citrate/none        |
| 1D7A   | <i>E. coli</i>      | wt       | 8.0 | 8                | AIRx (4)/none(4)    |
| 2FWI   | <i>A. aceti</i>     | H59D     | 7.0 | 2                | AIR/none            |
| 2FWJ   | <i>A. aceti</i>     | wt       | 7.0 | 2                | AIR/none            |
| 2FWP   | <i>A. aceti</i>     | H59N     | 5.4 | 2                | isoCAIR/citrate     |
|        | <i>E. coli</i>      | H45N     | 8.0 | 1                | CAIR                |
|        | <i>E. coli</i>      | H45Q     | 8.0 | 1                | CAIR                |
| 2ATE   | <i>E. coli</i>      | wt       | 8.0 | 1                | nitroAIR            |
|        | <i>E. coli</i>      | H45Q     | 8.0 | 1                | nitroAIR            |

\*PurE octamers containing bound ligands and multiple monomers per asymmetric unit usually show the same ligand structure for fourfold related monomers and different ligand structures for twofold related monomers. The two different ligand structures corresponding to the latter case are separated by a slash.

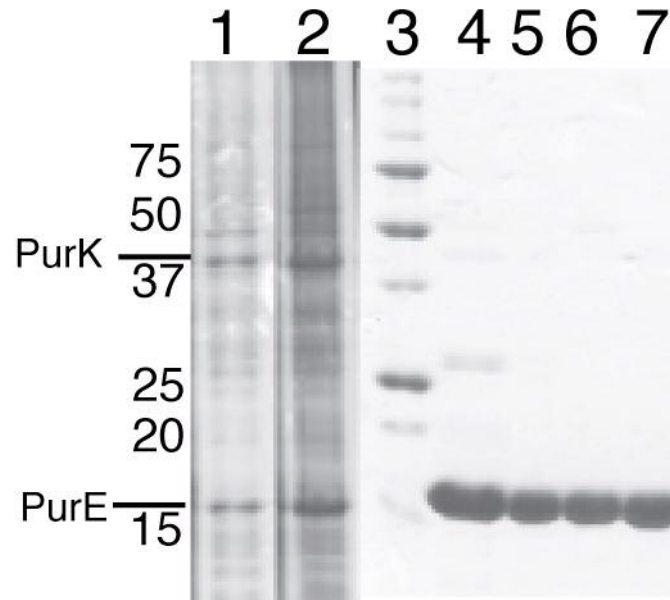

Supplemental Figure 1: 15% SDS-PAGE Gel of PurE Proteins. Lane 1: total cell lysate of wt PurE/PurK expression in PCO135 *E. coli* t = 0 h; 2: total cell lysate at t = 4 h after heat induction; 3: MW Markers; 4: wt PurE; 5: H45Q PurE; 6: H45W PurE; 7: H45N PurE. For lanes 4-7, 5  $\mu$ g of protein was loaded.

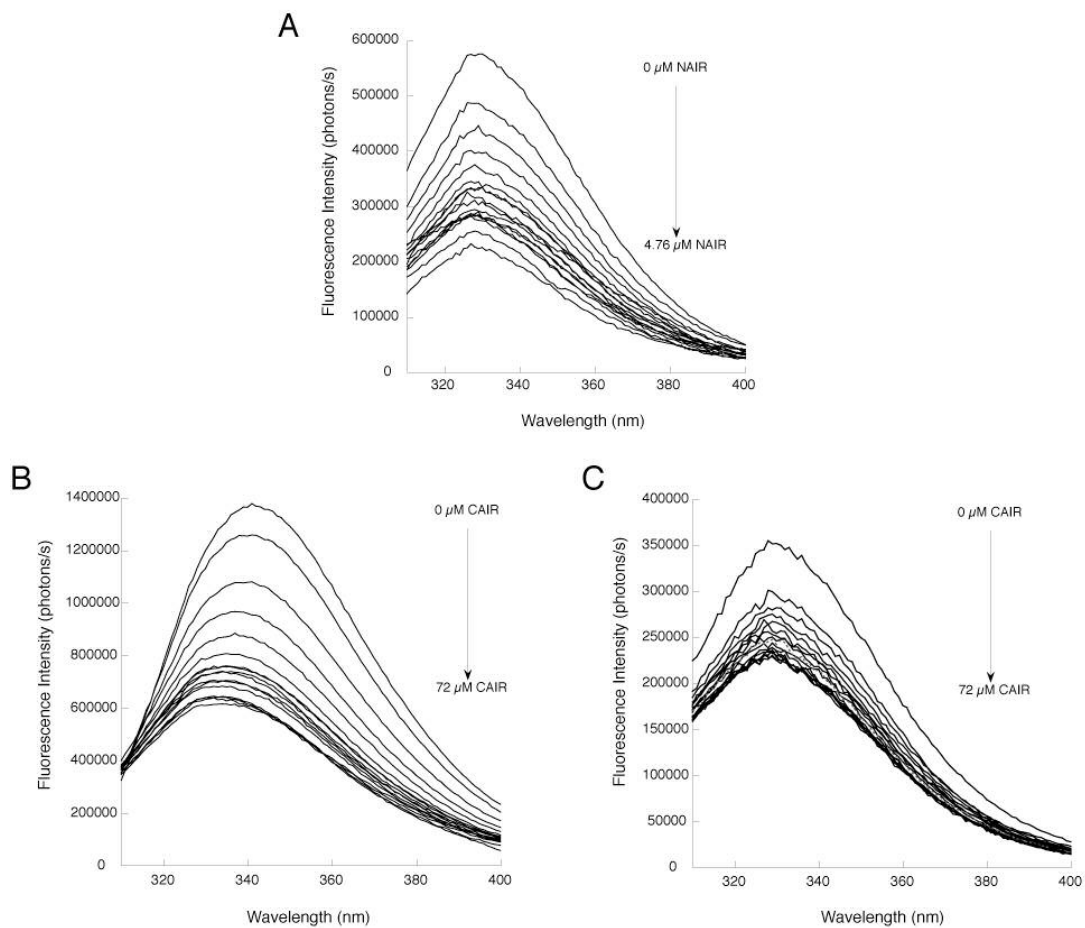

Supplemental Figure 2: Observed changes in fluorescence upon titration of PurE. (A) Titration of wt PurE with NO<sub>2</sub>-AIR. (B) Titration of H45N PurE with CAIR. (C) Titration of H45Q PurE with CAIR. After background subtraction, fluorescence decreases at a  $\lambda_{\text{max}}$  of 335 nm for (A) and (C) and a decrease and blue shift from 345  $\rightarrow$  335 nm (B) were observed.

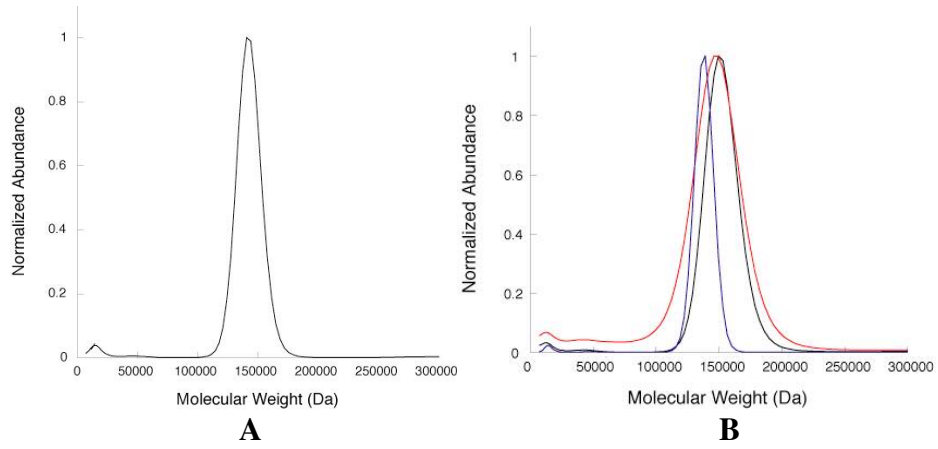

Supplemental Figure 3: Distribution of molecular weights obtained from SedFit analysis of SV-AUC data for PurE mutants. (A) wt PurE. (B) H45N (black), H45Q (red), and H45W (blue) PurE mutants.



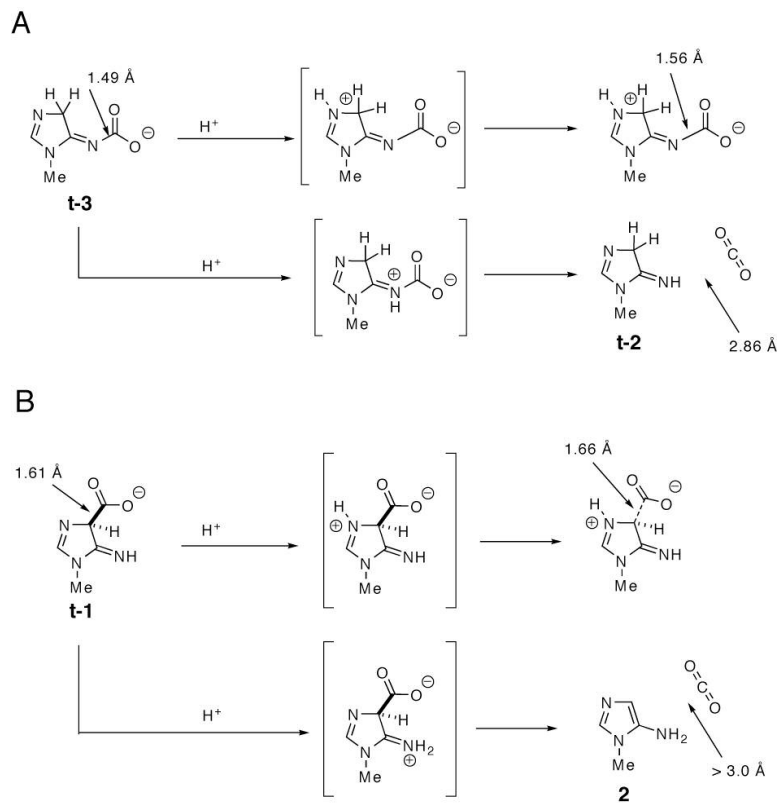

Supplemental Figure 4: Computational studies on the effects of protonation of compounds **t-3** and **t-1** on loss of CO<sub>2</sub> and bond lengths.

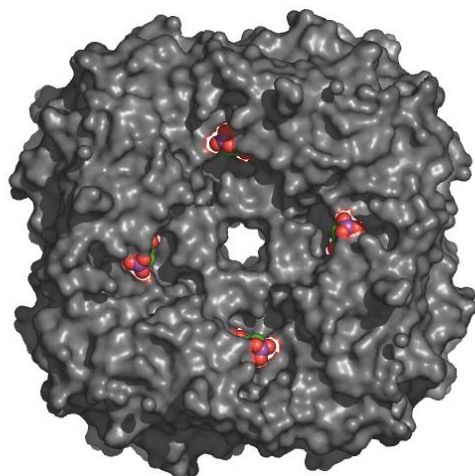

Supplemental Figure 5: Surface representation of the wt PurE octamer in grey. NO<sub>2</sub>-AIR molecules on one face of the octamer are shown in spacefilling representation and colored using a CPK scheme. NO<sub>2</sub>-AIR binds close to the surface. While the ribose-5' phosphate moiety is exposed to the solvent, the aminoimidazole and nitro groups are buried.

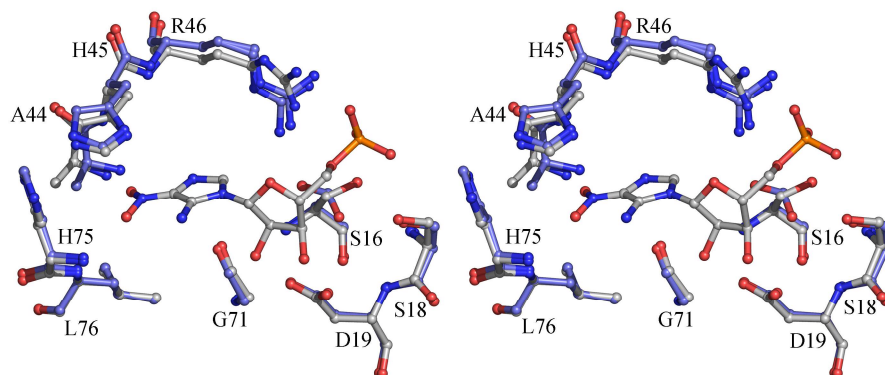

Supplemental Figure 6. Overlay of the active sites of apo wt EcPurE (blue) and the wt EcPurE NO<sub>2</sub>-AIR co-crystal structure (grey). Conformational changes occurring upon ligand binding are limited to residues involved in binding the 5'-phosphate.

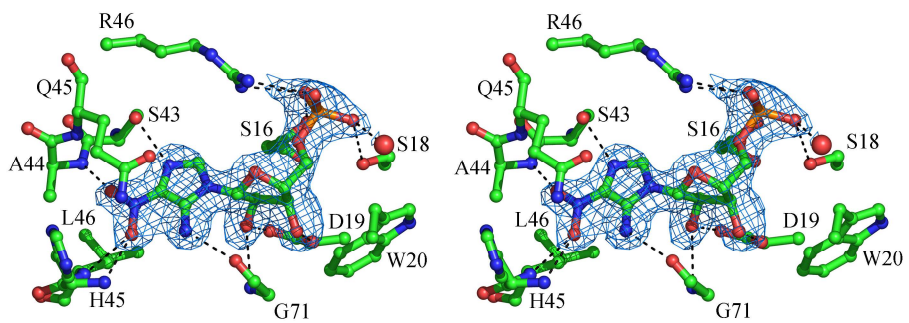

Supplemental Figure 7. Active site of EcPurE-H45Q-NO<sub>2</sub>-AIR complex with fo-fc density ( $2\sigma$ ) shown.

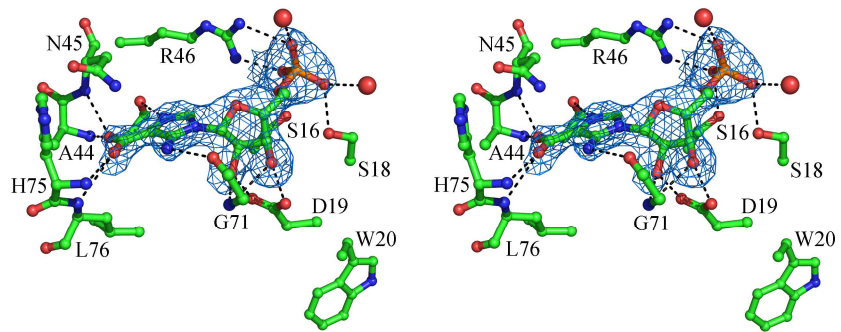

Supplemental Figure 8. Active site of EcPurE-H45N-CAIR complex with fo-fc density ( $2\sigma$ ) shown.

A

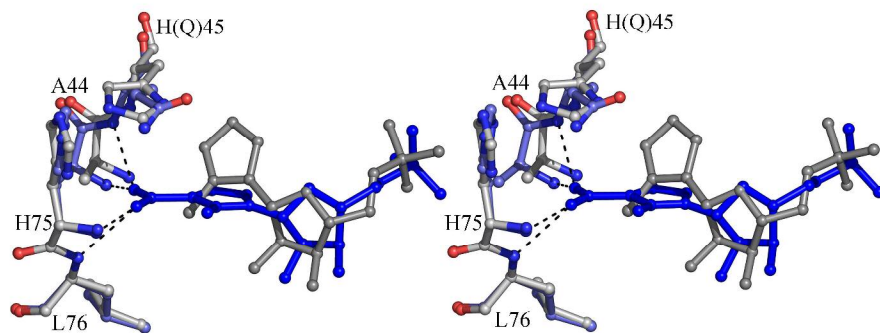

B

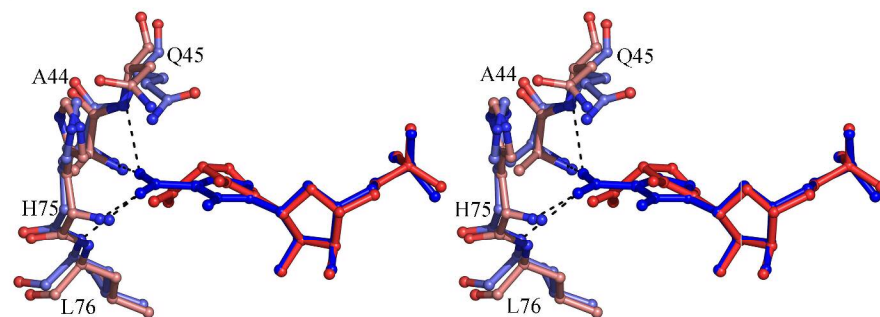

Supplemental Figure 9. A comparison of substrate binding conformations in PurE. (A) Superposition of H45Q EcPurE with CAIR (blue) and wt EcPurE-AIRx (grey). (B) Superposition of H45Q EcPurE with CAIR (blue) and isoCAIR from H59N AaPurE (red).

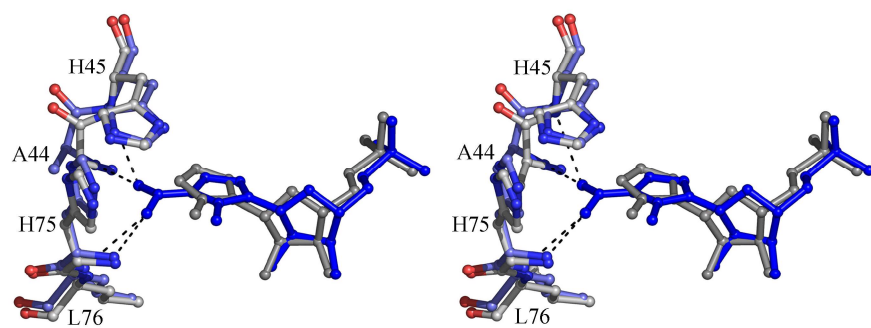

Supplemental Figure 10. Comparison of the NO<sub>2</sub>-AIR/EcPurE (wt) with AIR/AaPurE (wt) complexes. EcPurE is in blue, AaPurE is in grey. Numbering is for EcPurE.
